# Supplementary material for: Multifactor Effects and Evidence of Potential Interaction between Complement Factor H Y402H and LOC387715 A69S in Age-Related Macular Degeneration
Source: PLoS One. 2008 Dec 2;3(12):e3833. doi: 10.1371/journal.pone.0003833 (PMC2585793; doi:10.1371/journal.pone.0003833)
Supplement: Table S4 — (0.05 MB DOC) [file pone.0003833.s005.doc]

**Table S4.** Odds ratios **(**OR) and 95% confidence intervals (95% CI) for the Y402H polymorphism of the *complement factor H* gene, the A69S polymorphism of the *LOC387715* gene, and the R102G polymorphism of the *complement component 3* (*C3*) gene. AMD cases are compared to blood donor controls (n=350). ORhet refers to comparison of heterozygous genotype to homozygous normal genotype, ORhom to comparison of homozygous risk genotype to homozygous normal genotype, and ORallele to comparison of risk allele to normal allele.

| Case group (n) | Risk factor | ORhet | 95% CI | ORhom | 95% CI | ORallele | 95% CI |
| --- | --- | --- | --- | --- | --- | --- | --- |
| Familial cases (181) | *CFH* | 2.04 | (1.22-3.51) | 5.51 | (3.21-9.74) | 3.05 | (1.89-5.10) |
|  | *LOC387715* | 2.98 | (1.96-4.58) | 9.77 | (5.48-17.95) | 3.23 | (2.47-4.22) |
|  | *C3* | 1.48 | (1.01-2.17) | 1.64 | (0.68-3.82) | 1.39 | (1.02-1.88) |
|  |  |  |  |  |  |  |  |
| Sporadic cases (151) | *CFH* | 2.78 | (1.59-5.11) | 5.20 | (2.85-9.92) | 3.49 | (2.05-6.26) |
|  | *LOC387715* | 2.55 | (1.68-3.93) | 5.08 | (2.68-9.74) | 2.34 | (1.76-3.11) |
|  | *C3* | 0.93 | (0.61-1.42) | 0.99 | (0.34-2.58) | 0.96 | (0.67-1.34) |
|  |  |  |  |  |  |  |  |
| All AMD cases (332) | *CFH* | 2.36 | (1.55-3.64) | 5.40 | (3.42-8.66) | 3.25 | (2.19-4.89) |
|  | *LOC387715* | 2.77 | (1.98- 3.89) | 7.39 | (4.42-12.77) | 2.79 | (2.22-3.51) |
|  | *C3* | 1.21 | (0.87-1.67) | 1.30 | (0.62-2.79) | 1.18 | (0.91-1.54) |
